# Supplementary material
Source: PubMed Central journal article supplement (PMC2579382)
Supplement: 0802701105_0802701105SI.pdf [file 0802701105_0802701105SI.pdf]

# Supporting Information

Sun and Lin 10.1073/pnas.0802701105

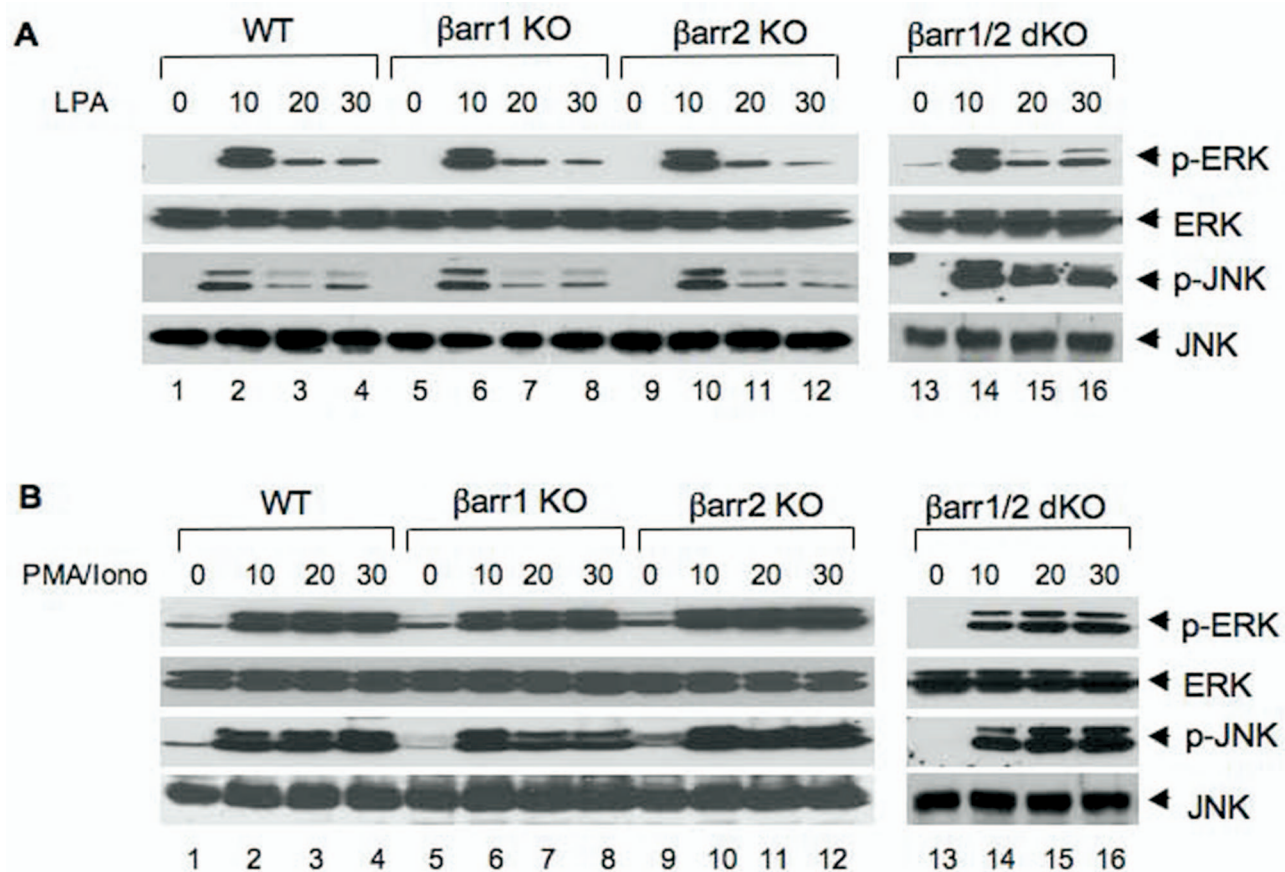

**Fig. S1.** MAP kinase activation induced by lysophosphatidic acid (LPA) and phorbol 12-myristate 13-acetate plus ionomycin (PMA/Iono) is independent of  $\beta$ -arrestins. Wild-type,  $\beta$ -arrestin 1 knockout ( $\beta$ arr1 KO),  $\beta$ -arrestin 2 knockout ( $\beta$ arr2 KO), and  $\beta$ -arrestin 1/ $\beta$ -arrestin 2 double knockout ( $\beta$ arr1/2 dKO) murine embryonic fibroblast (MEF) cells were stimulated with LPA (10  $\mu$ M) (A) and PMA (40 ng/ml) plus ionomycin (100 ng/ml) (B) for the indicated time course. Phosphorylation of ERK and JNK, as well as their loading controls, was examined by Western blotting using the indicated antibodies.

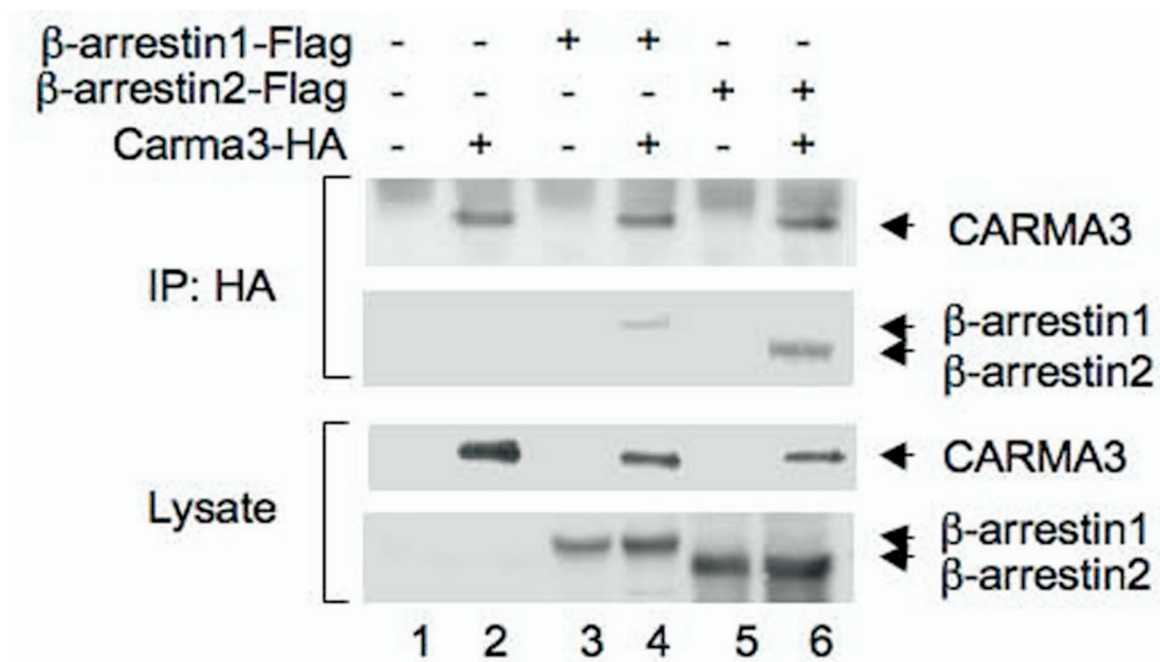

**Fig. S2.** CARMA3 can form a complex with both  $\beta$ -arrestin 1 and  $\beta$ -arrestin 2. HEK293T cells were transfected with expression vectors encoding HA-tagged CARMA3, FLAG-tagged  $\beta$ -arrestin 1, or FLAG-tagged  $\beta$ -arrestin 2 in different combinations. Twenty hours after transfection, cell lysates were subjected to immunoprecipitation (IP) with anti-HA antibody-conjugated beads, and immunoprecipitated proteins and cell lysates were subjected to SDS/PAGE and analyzed by immunoblotting using the indicated antibodies.



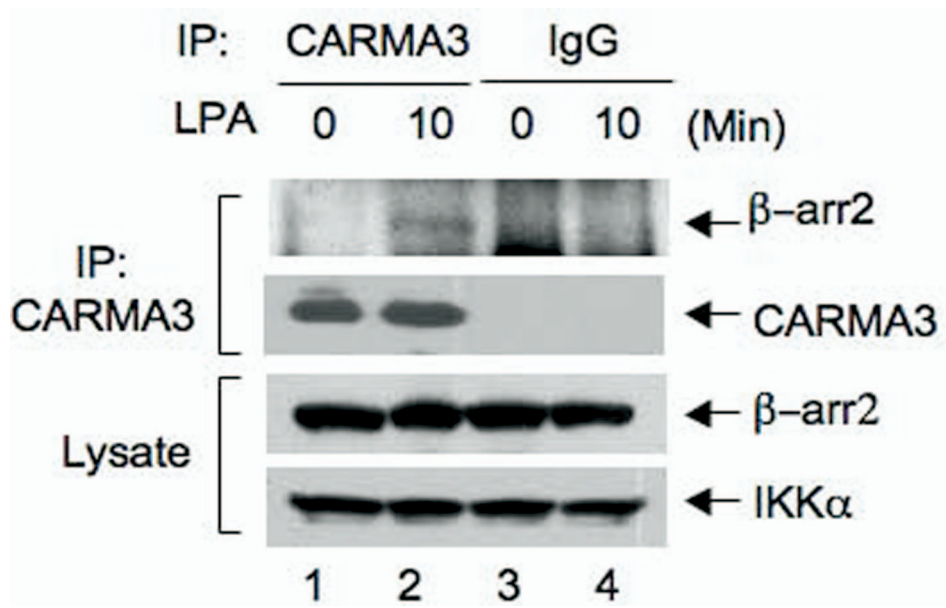

**Fig. S4.** CARMA3 associates with  $\beta$ -arrestin 2. Wild-type MEF cells (15-cm plate, 80% confluent) were stimulated with or without LPA for 10 min and then were scraped off and lysed with lysis buffer (containing 1% Nonidet P-40 and 250 mM NaCl). The resulting lysates were subjected to immunoprecipitation (IP) with CARMA3 antibody-conjugated beads or IgG control beads. The obtained immunocomplexes were washed three times and subjected to SDS/PAGE and Western blotting using anti- $\beta$ -arrestin 2 or CARMA3.
